# Supplementary material for: Inserted hydrogen promotes oxidation catalysis of mixed Ru 0.3 Ti 0.7 O 2 as exemplified with total propane oxidation and the HCl oxidation reaction
Source: Royal Society of Chemistry journal article supplement (doi:10.1039/d2cy02000a), 2023-01-01
Supplement: d2cy02000a1.pdf [file d2cy02000a1.pdf]

## Supporting Information

### Inserted Hydrogen Promotes Oxidation Catalysis of Mixed $\text{Ru}_{0.3}\text{Ti}_{0.7}\text{O}_2$ as Exemplified with Total Propane Oxidation and HCl Oxidation Reaction

Wei Wang,<sup>a,b</sup> Phillip Timmer,<sup>b</sup> Alexander Spriewald Luciano,<sup>b</sup> Yu Wang,<sup>a,b</sup> Tim Weber,<sup>b</sup>  
Lorena Glatthaar,<sup>b</sup> Yun Guo,<sup>a\*</sup> Bernd M. Smarsly,<sup>b\*</sup> Herbert Over<sup>b\*</sup>

*a) Key Laboratory for Advanced Materials, Research Institute of Industrial Catalysis, School of Chemistry and Molecular Engineering, East China University of Science and Technology, Shanghai 200237, PR China*

*b) Institute of Physical Chemistry, Justus Liebig University, Heinrich-Buff-Ring 17, D-35392 Giessen, Germany*

\*Corresponding author: email [Herbert.Over@phys.chemie.uni-giessen.de](mailto:Herbert.Over@phys.chemie.uni-giessen.de);  
[Bernd.Smarsly@phys.Chemie.uni-giessen.de](mailto:Bernd.Smarsly@phys.Chemie.uni-giessen.de); [yunguo@ecust.edu.cn](mailto:yunguo@ecust.edu.cn)

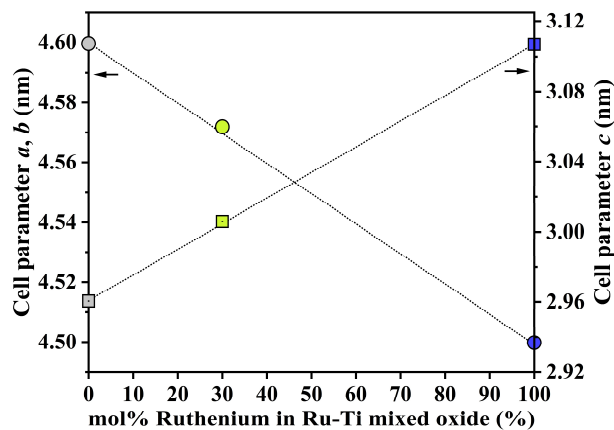

**Figure S1:** Lattice parameters of rutile  $\text{TiO}_2$ ,  $\text{RuO}_2$  and  $\text{Ru}_x\text{Ti}_{1-x}\text{O}_2$  of  $\text{Ru}_{30}$ , as derived from the peak deconvolution of rutile (110) and rutile (101). Assuming the validity of Vegard's rule, the composition  $x$  of  $\text{Ru}_x\text{Ti}_{1-x}\text{O}_2$  in  $\text{Ru}_{30}$  is determined to be  $x=30 \pm 3\%$ .

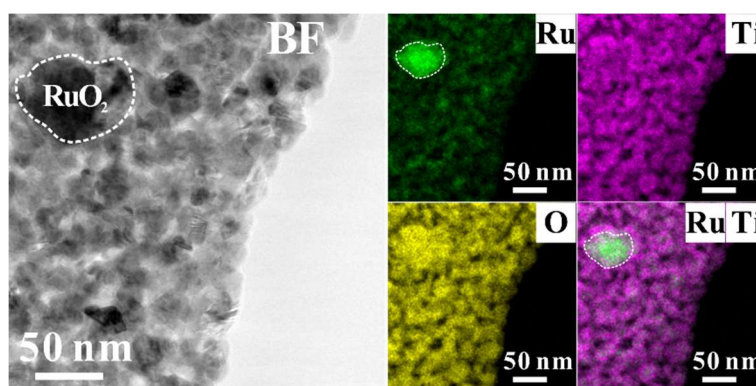

**Figure S2:** High resolution bright field (BF) images of  $\text{Ru}_{30}$ . EDS mapping images are also presented on the right: green = Ru; magenta = Ti; yellow = O, indicating the presence of big  $\text{RuO}_2$  particles supported on an otherwise mixed  $\text{Ru}_x\text{Ti}_{1-x}\text{O}_2$ ;  $x = 26 \pm 4 \text{ mol}\%$ .

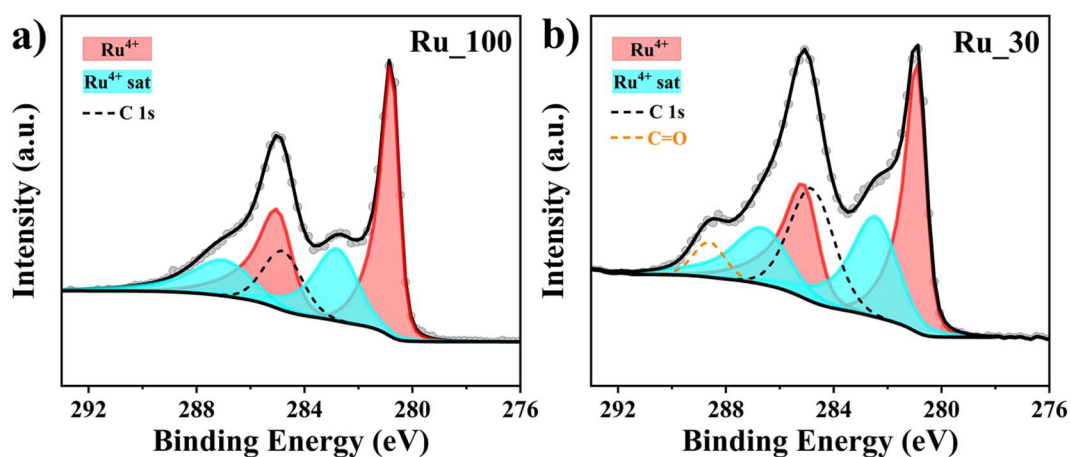

**Figure S3:** Deconvolution of Ru 3d XP spectra of freshly prepared  $\text{Ru}_{100}$  and  $\text{Ru}_{30}$ .

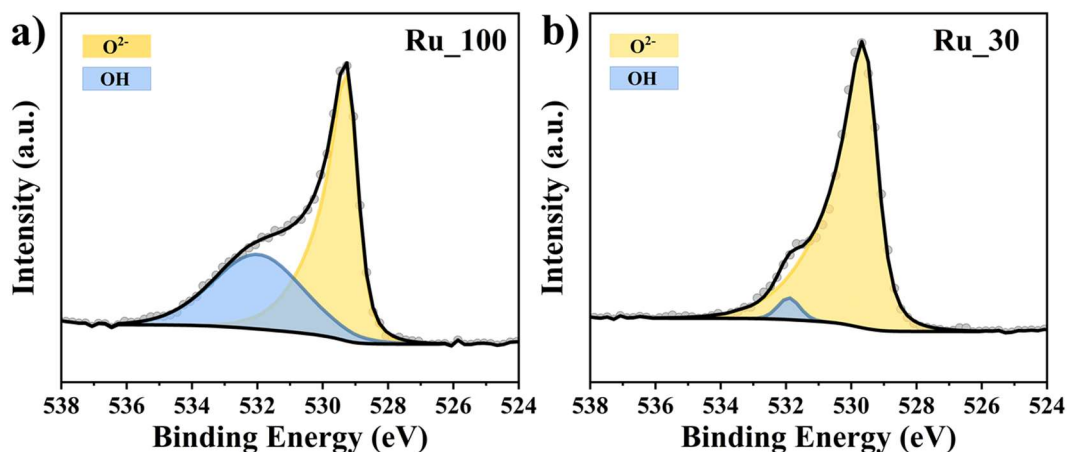

Figure S4: Deconvolution of O 1s spectra of freshly prepared Ru\_100 and Ru\_30.

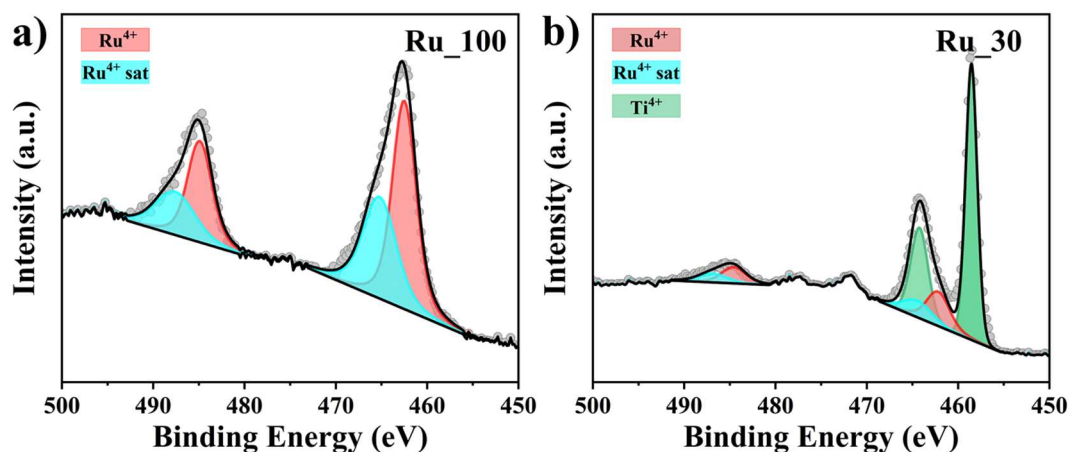

Figure S5: Deconvolution of Ru 3p and Ti 2p XP spectra of Ru\_100 and Ru\_30.

Table S1: Optimized fitting parameters for the deconvolution of Ru 3d, Ru 3p, Ti 2p and O 1s of used in our study.

|                        | Ru 100                | Ru 30 | Ru 30 250R | Ru 30 250R 3000 |
|------------------------|-----------------------|-------|------------|-----------------|
| BE (eV) Ru3d-5/2       | 280.7                 | 280.8 | 280.8      | 281.0           |
| FWHM                   | 0.71                  | 0.82  | 0.85       | 0.85            |
| Line shape             | LF (0.4, 1, 45, 280)  |       |            |                 |
| BE (eV) Ru3d-3/2       | 284.9                 | 285.0 | 284.9      | 285.2           |
| FWHM                   | 1.32                  | 1.30  | 1.12       | 1.31            |
| Line shape             | LF (0.4, 1, 45, 280)  |       |            |                 |
| BE (eV) Ru3d-5/2 sat   | 282.7                 | 282.3 | 281.6      | 282.5           |
| FWHM                   | 1.81                  | 1.89  | 1.51       | 1.88            |
| Line shape             | LF (0.6, 1, 45, 280)  |       |            |                 |
| BE (eV) Ru3d-3/2 sat   | 286.9                 | 286.5 | 285.8      | 286.7           |
| FWHM                   | 2.43                  | 2.26  | 2.34       | 2.28            |
| Line shape             | LF (0.6, 1, 45, 280)  |       |            |                 |
| BE (eV) Ru3d-5/2 metal | -                     | -     | 280.2      | 280.3           |
| FWHM                   | -                     | -     | 0.60       | 0.71            |
| Line shape             | LF (1.2, 1, 400; 280) |       |            |                 |
| BE (eV) Ru3d-3/2 metal | -                     | -     | 284.4      | 284.5           |

|                      |   |        |                          |       |
|----------------------|---|--------|--------------------------|-------|
| FWHM                 | - | -      | 0.80                     | 0.89  |
| Line shape           |   |        | LF (1.01, 1.25, 500, 50) |       |
|                      |   | Ru_100 |                          | Ru_30 |
| BE (eV) Ru3p-3/2     |   | 462.5  |                          | 462.2 |
| FWHM                 |   | 3.11   |                          | 3.00  |
| Line shape           |   |        | LF(1, 1, 45, 280)        |       |
| BE (eV) Ru3p-1/2     |   | 484.9  |                          | 484.5 |
| FWHM                 |   | 3.2    |                          | 3.00  |
| Line shape           |   |        | LF(1, 1, 45, 280)        |       |
| BE (eV) Ru3p-3/2 sat |   | 465.3  |                          | 464.5 |
| FWHM                 |   | 4.34   |                          | 3.81  |
| Line shape           |   |        | LF(1, 1, 45, 280)        |       |
| BE (eV) Ru3p-1/2 sat |   | 487.6  |                          | 486.9 |
| FWHM                 |   | 5.07   |                          | 4.08  |
| Line shape           |   |        | LF(1, 1, 45, 280)        |       |
| BE (eV) Ti2p-3/2     |   | -      |                          | 458.5 |
| FWHM                 |   | -      |                          | 1.46  |
| Line shape           |   |        | GL(30)                   |       |
| BE (eV) Ti2p-1/2     |   | -      |                          | 464.2 |
| FWHM                 |   | -      |                          | 2.24  |
| Line shape           |   |        | GL(30)                   |       |
|                      |   | Ru_100 |                          | Ru_30 |
| BE (eV) O-1s         |   | 529.2  |                          | 529.5 |
| FWHM                 |   | 0.86   |                          | 1.07  |
| Line shape           |   |        | LF(0.37, 1.2, 25, 110)   |       |
| BE (eV) O-1s sat     |   | 532.0  |                          | 531.9 |
| FWHM                 |   | 3.22   |                          | 0.80  |
| Line shape           |   |        | GL(30)                   |       |

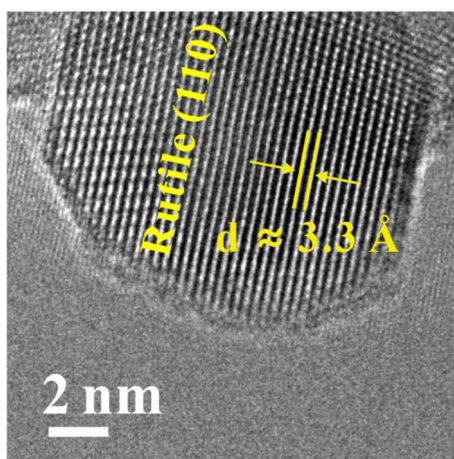

**Figure S6:** HR-TEM images of Ru\_30, showing the plane distance  $d \approx 3.3 \text{ \AA}$ , which is shorter than the d-spacing of Ru\_30\_250R shown in Fig 3c, indicating a lattice expansion along (110) direction after hydrogen treatment at 250 °C.

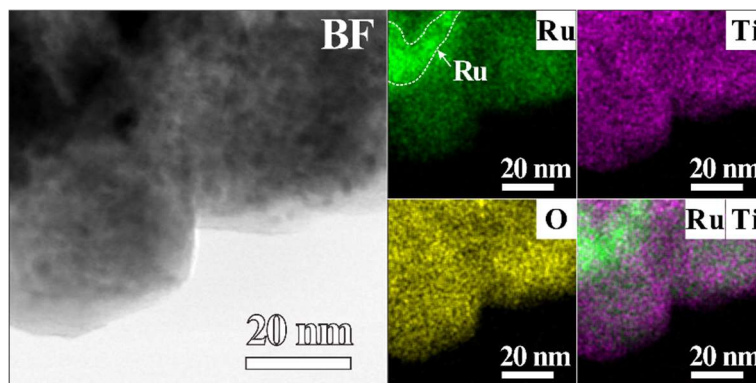

**Figure S7:** High resolution bright field (BF) images of Ru\_30\_250R with metallic Ru particles. EDS mapping images are also presented on the right: green = Ru; magenta = Ti; yellow = O.

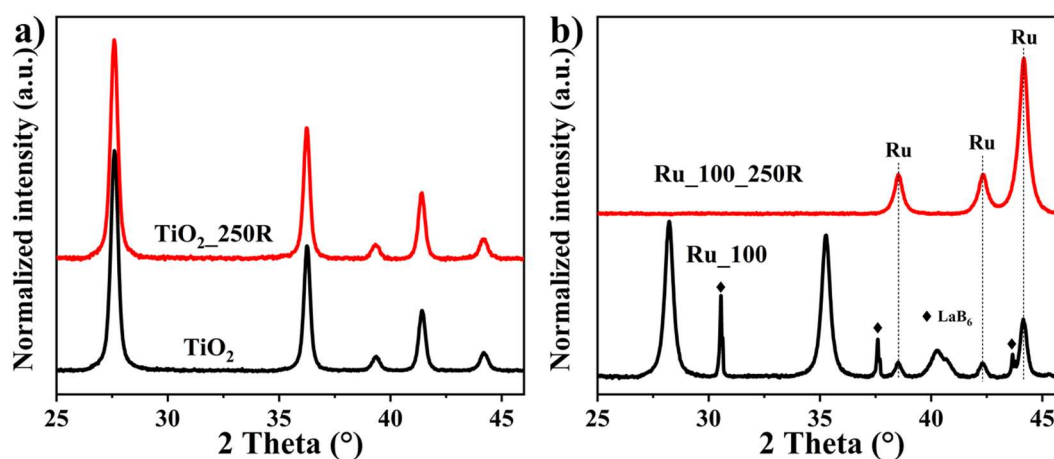

**Figure S8:** XRD diffraction from Ru\_100 (a) and pure rutile TiO<sub>2</sub> (b) before and after reduction treatment with 4%H<sub>2</sub>/N<sub>2</sub> at 250 °C.

**Table S2:** Microstrain and crystallite size of different catalysts determined by Williamson-Hall method.

| Catalyst                                           | Microstrain | Crystallite size (nm) |
|----------------------------------------------------|-------------|-----------------------|
| Ru_30_250R                                         | 0.0120      | 12.2 ± 3              |
| Ru_30_250R_50O                                     | 0.0063      | 11.5 ± 4              |
| Ru_30_250R_100O                                    | 0.0020      | 12.2 ± 1              |
| Ru_30_250R_200O                                    | 0.0013      | 11.9 ± 1              |
| Ru_30_250R_300O                                    | 0.0005      | 11.2 ± 1              |
| Ru_30_250R_H <sub>2</sub> _3 cycles                | 0.0070      | 13.1 ± 4              |
| Ru_30_250R_C <sub>3</sub> H <sub>8</sub> _3 cycles | 0.0020      | 13.8 ± 3              |

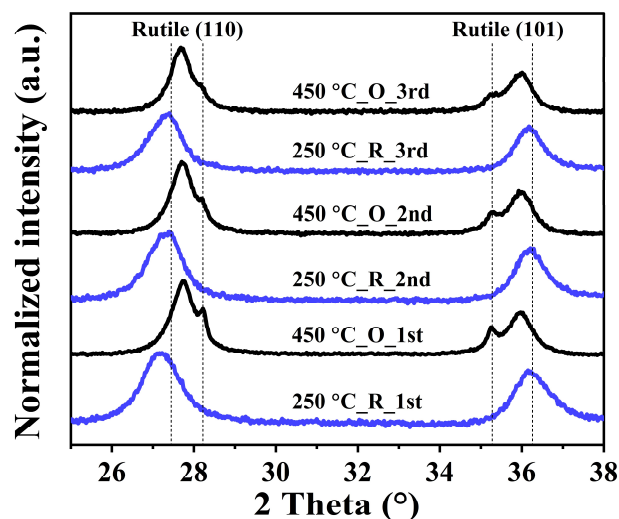

**Figure S9:** XRD patterns of Ru<sub>30</sub> catalysts after calcination in hydrogen at 250 °C and re-oxidation at 450 °C for three cycles.

**Table S3:** Optimized peak deconvolution information (cf. **Figure 3**) of Ru<sub>30</sub> catalyst treated in H<sub>2</sub>/N<sub>2</sub> at different temperatures.

| Catalyst              | Rutile 110      |      |      |                   |      |      |                         |      |      |
|-----------------------|-----------------|------|------|-------------------|------|------|-------------------------|------|------|
|                       | Component (red) |      |      | Component (green) |      |      | RuO <sub>2</sub> (blue) |      |      |
|                       | Pos.            | FWHM | Area | Pos.              | FWHM | Area | Pos.                    | FWHM | Area |
| Ru <sub>30</sub>      | -               | -    | -    | 27.77             | 0.64 | 0.80 | 28.23                   | 0.17 | 0.12 |
| Ru <sub>30_150R</sub> | -               | -    | -    | 27.75             | 0.54 | 0.73 | 28.21                   | 0.18 | 0.10 |
| Ru <sub>30_170R</sub> | 27.11           | 0.89 | 0.31 | 27.70             | 0.69 | 0.73 | 28.22                   | 0.19 | 0.09 |
| Ru <sub>30_190R</sub> | 26.90           | 0.60 | 0.28 | 27.48             | 0.90 | 0.97 | -                       | -    | -    |
| Ru <sub>30_210R</sub> | 29.91           | 0.41 | 0.14 | 27.19             | 1.06 | 0.99 | -                       | -    | -    |
| Ru <sub>30_230R</sub> | 26.92           | 0.36 | 0.06 | 27.20             | 1.06 | 1.04 | -                       | -    | -    |
| Ru <sub>30_250R</sub> | -               | -    | -    | 27.20             | 1.10 | 1.22 | -                       | -    | -    |

  

| Catalyst              | Rutile 101              |      |      |                   |      |      |                 |      |      |
|-----------------------|-------------------------|------|------|-------------------|------|------|-----------------|------|------|
|                       | RuO <sub>2</sub> (blue) |      |      | Component (green) |      |      | Component (red) |      |      |
|                       | Pos.                    | FWHM | Area | Pos.              | FWHM | Area | Pos.            | FWHM | Area |
| Ru <sub>30</sub>      | 35.27                   | 0.22 | 0.13 | 35.92             | 0.70 | 0.45 | -               | -    | -    |
| Ru <sub>30_150R</sub> | 35.25                   | 0.23 | 0.11 | 35.88             | 0.63 | 0.45 | -               | -    | -    |
| Ru <sub>30_170R</sub> | 35.26                   | 0.23 | 0.08 | 35.93             | 0.64 | 0.44 | 36.50           | 0.85 | 0.20 |
| Ru <sub>30_190R</sub> | -                       | -    | -    | 36.06             | 0.79 | 0.67 | 36.65           | 0.83 | 0.18 |
| Ru <sub>30_210R</sub> | -                       | -    | -    | 36.24             | 0.90 | 0.63 | 36.92           | 0.66 | 0.13 |
| Ru <sub>30_230R</sub> | -                       | -    | -    | 36.24             | 0.89 | 0.60 | 36.83           | 0.50 | 0.09 |
| Ru <sub>30_250R</sub> | -                       | -    | -    | 36.24             | 1.04 | 0.71 | -               | -    | -    |

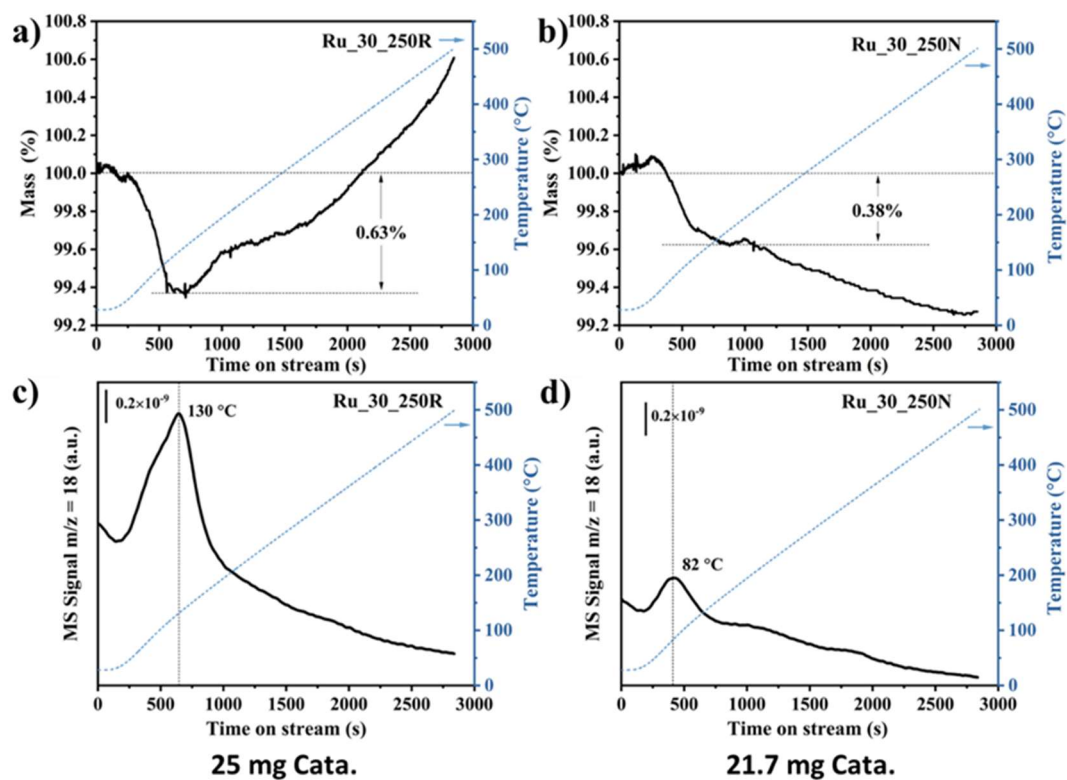

**Figure S10:** TGA-MS raw data of Ru\_30\_250R and Ru\_30\_250N. The catalyst is heated from room temperature to 500 °C under 30 mL/min of dry air. Mass spectrometry (c, d) is used to monitor the gas composition during the heating ramp. After peak deconvolution of H<sub>2</sub>O signal ( $m/z = 18$ ) (cf. **Figure 4**), the amount of inserted hydrogen is calculated by the difference of the integral area of H<sub>2</sub>O. The amount of inserted hydrogen is also counterchecked by the difference of the weight loss in TG (a, b), the estimated H% is 18.3%, which is very close to the value calculated by the MS data (17.6%).

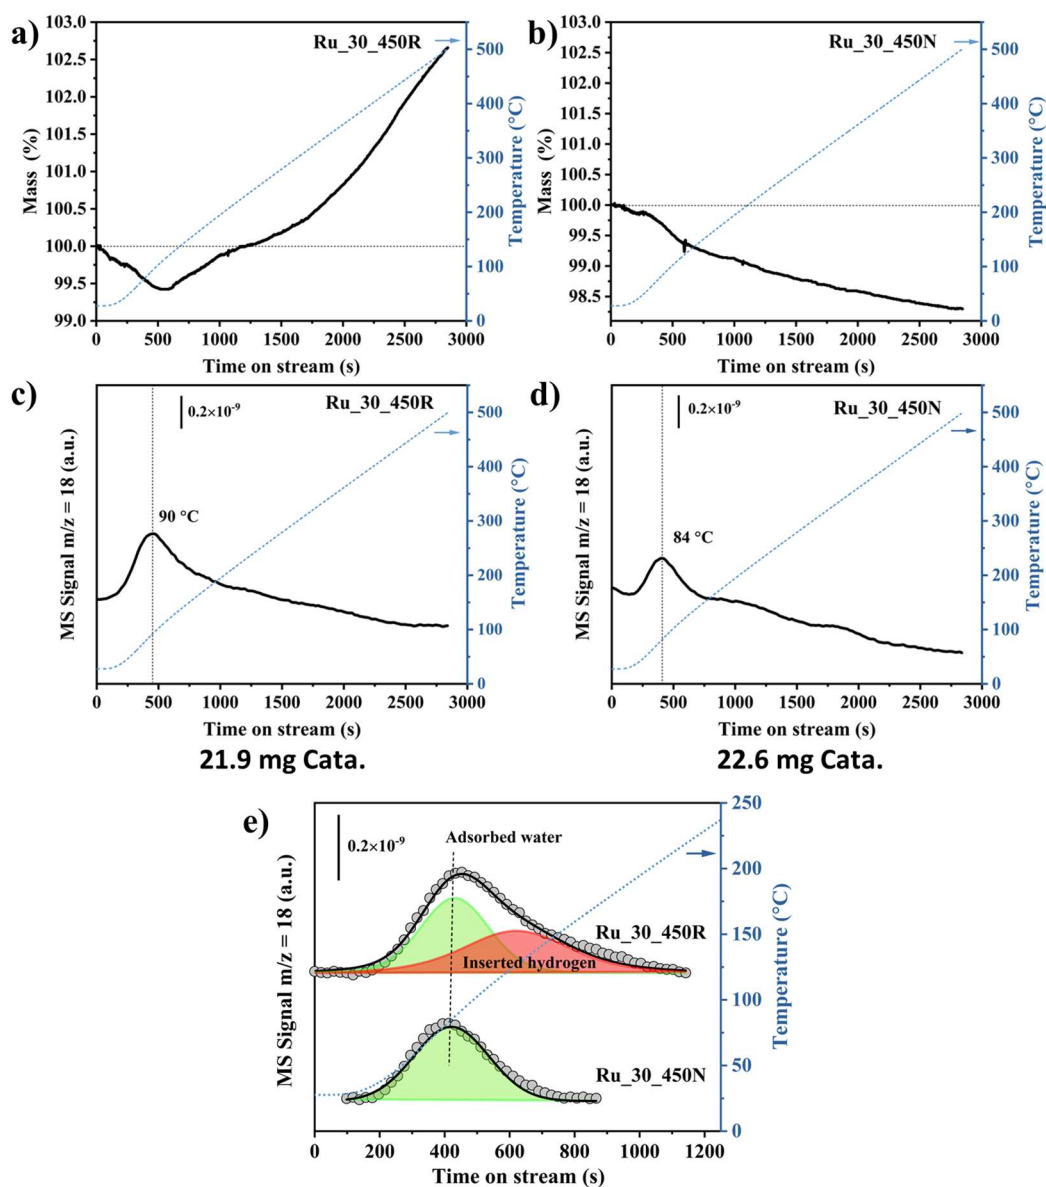

**Figure S11:** TGA-MS raw data of Ru\_30\_450R and Ru\_30\_450N. The catalyst is heated from room temperature to 500 °C under 30 mL/min of dry air. Mass spectrometer (c, d) is used to monitor the gas composition during the heating ramp. e) The amount of inserted hydrogen is calculated by the difference of the integral area of H<sub>2</sub>O, indicating lower incorporation of hydrogen into the lattice (6.6 mol%) than for Ru\_30\_250R (17.6 mol%).



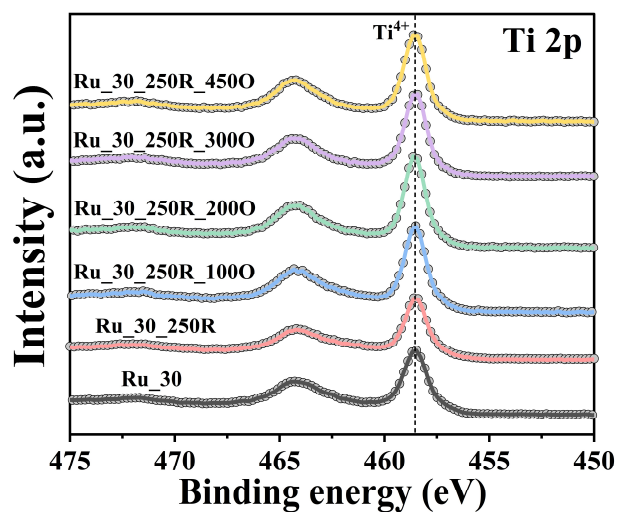

Figure S12: XPS-Ti 2p for fresh Ru<sub>30</sub> in comparison to hydrogen treated sample and the re-oxidized one.

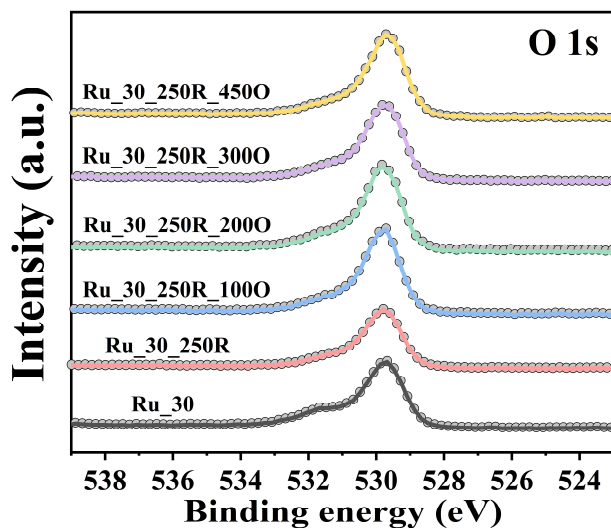

Figure S13: XPS-O1s for fresh Ru<sub>30</sub> in comparison to hydrogen treated sample and the re-oxidized one.

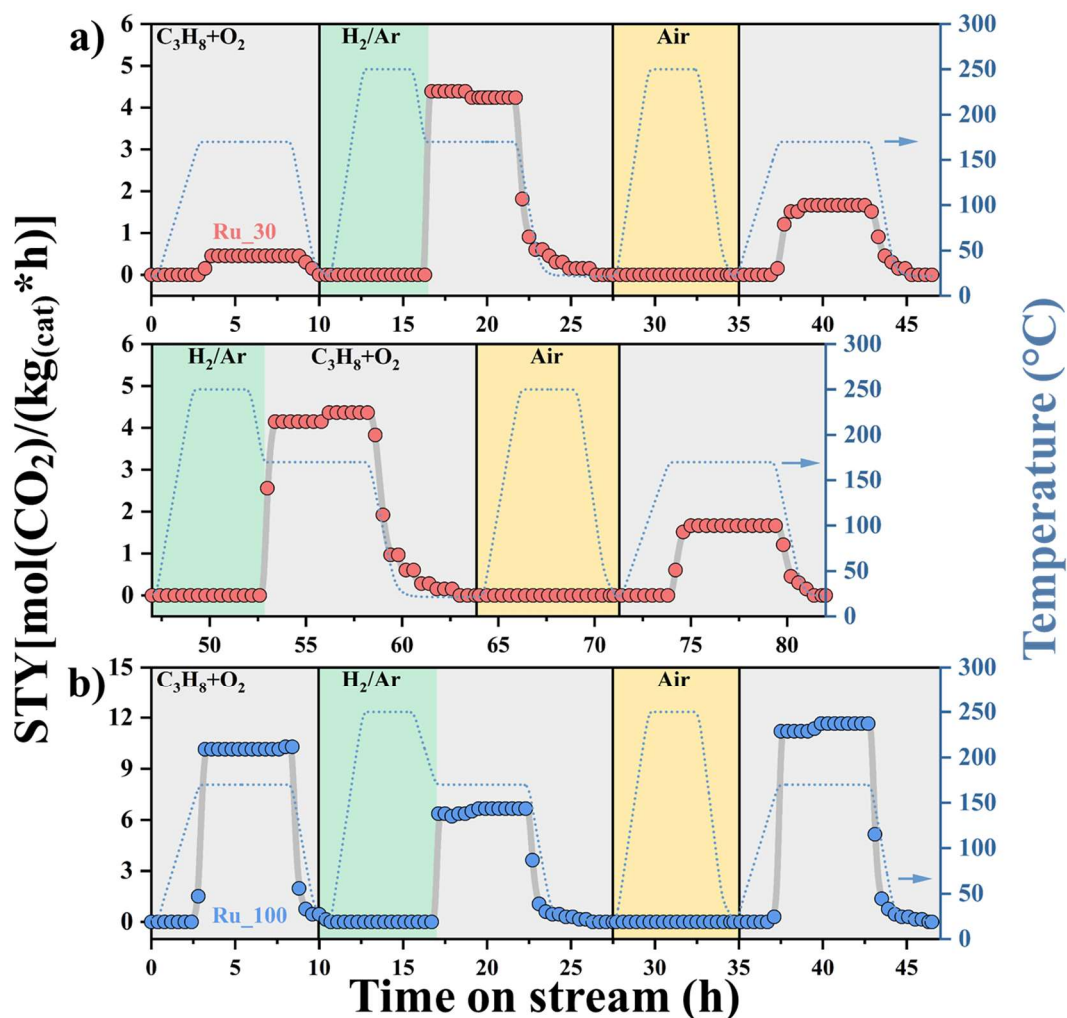

**Figure S14:** STY as a function of reaction time on catalytic propane combustion over a) Ru<sub>30</sub> and b) Ru<sub>100</sub> when measured for 3 cycles at 170 °C (blue dotted line). Before switched to the reaction mixture the catalyst is exposed to different gas atmosphere during the heat ramping: first under reaction mixture, followed by reduction under 4% H<sub>2</sub>/Ar for 3 hours, and last pretreated under air for 3 hours. The grey background represents total C<sub>3</sub>H<sub>8</sub> oxidation reaction conditions: 1 vol% C<sub>3</sub>H<sub>8</sub>, 5 vol% O<sub>2</sub>, balanced by N<sub>2</sub>; total volume flow: 100 sccm/min, temperature ramp: 1 K/min. The green background represents the gas mixture during heating and cooling stage: 4% H<sub>2</sub>/Ar, total volume flow: 50 sccm/min. The yellow background represents the gas mixture during the heating and cooling stage: Air, 50 sccm/min.

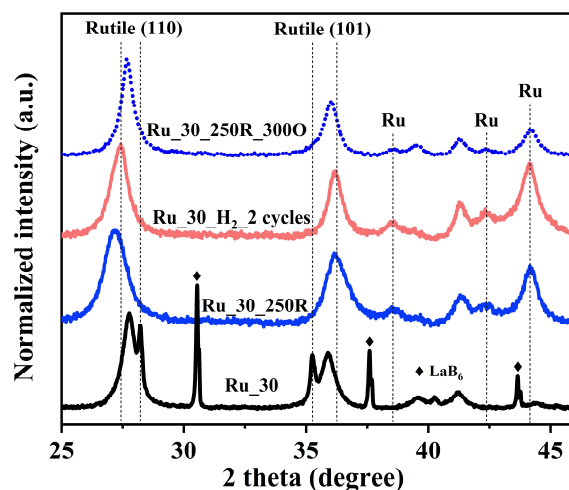

**Figure S15:** XRD data before and after cyclic experiments at 250 °C for Ru\_30. HCl oxidation reaction conditions: 3 sccm HCl, 1.5 sccm O<sub>2</sub>, balanced by Ar; total volume flow: 15 sccm/min. The XRD patterns of fresh Ru\_30, Ru\_30\_250R and Ru\_30\_250R\_3000 are also presented as reference; the dotted lines are guiding lines to follow the shift in  $2\theta$ . Here Ru\_30\_H<sub>2</sub>\_2 cycles means the catalyst after 2 cycles (2 in-situ treatments under hydrogen and then switched to reaction mixture) of Deacon tests and finally cooled down under 4% H<sub>2</sub>/Ar.

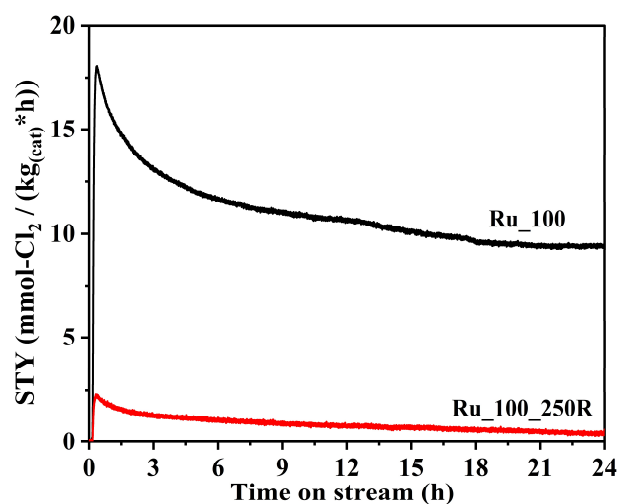

**Figure S16:** Catalytic HCl oxidation test of fresh Ru\_100 sample in comparison to that of Ru\_100\_250R at 250 °C. Ru\_100\_250R is about one order of magnitude less active in HCl oxidation than Ru\_100. Reaction conditions: 3 sccm HCl, 1.5 sccm O<sub>2</sub>, balanced by Ar; total volume flow: 15 sccm/min.

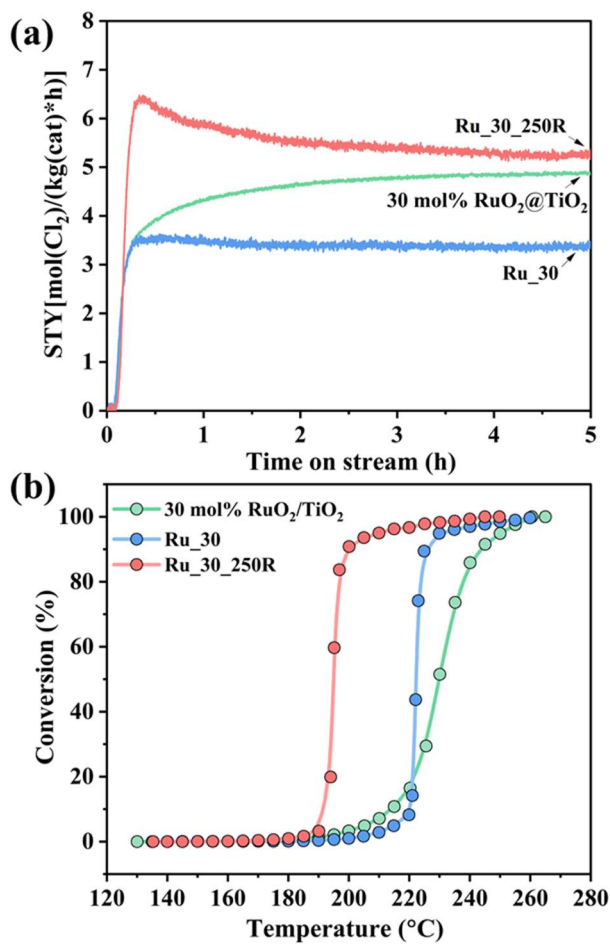

**Figure S17:** Catalytic HCl oxidation test at 250 °C (a) and propane oxidation test (b) of 30 mol% RuO<sub>2</sub>/TiO<sub>2</sub>\_rutile catalyst, the benchmark catalyst, however with similar Ru loading as Ru<sub>30</sub> in comparison with catalytic tests of Ru<sub>30</sub> and Ru<sub>30\_250R</sub>. Reaction conditions for HCl oxidation: 3 sccm HCl, 1.5 sccm O<sub>2</sub>, balanced by Ar; total volume flow: 15 sccm/min; Reaction conditions for propane oxidation: 1 vol% C<sub>3</sub>H<sub>8</sub>, 5 vol% O<sub>2</sub>, balanced by N<sub>2</sub>; total volume flow: 100 sccm/min, temperature ramp: 1 K/min. 30 mol% RuO<sub>2</sub>/TiO<sub>2</sub>\_rutile catalyst is prepared by incipient wetness impregnation method and calcined at 450 °C for 4 h.
